# Supplementary material for: Association between receiving the Aksi Bergizi Social Behavioral Change Communication (SBCC) intervention and hygiene behaviors among secondary school students in Padang, Indonesia
Source: PeerJ. 2025 Apr 7;13:e19256. doi: 10.7717/peerj.19256 (PMC11984468; doi:10.7717/peerj.19256)
Supplement: Supplemental Information 3 [file peerj-13-19256-s003.xlsx]

## Sheet: questions
Variable	Question
intervention	Student in Aksi Bergizi non-target school or target school
	Section A. Demographic characteristics
a2	Sex
a3	Date of Birth
a4	Ethnicity
a5	Fathers’ occupation
a6	Fathers’ education
a7	Mothers’ occupation
a8	Mothers’ education
a9	Household Monthly Income
a10	Religion
a10a	If Other Please Specify
a11	What is your approximate weight (in kg.)? (if don’t know, write 888; if refused to answer, write 999)
a12	What is your approximate height (in cm.)? (If don’t know, write 888; if refused to answer, write 999)
a13	What are the main media sources that you often encounter for obtaining information about health behaviors?
a14	When getting and searching for health issues, how accurate do you think the information is?
a15	Social media provides helpful resources for health information
	Section B. Exposures: Aksi Bergizi nutrition promotion program
b1	Did you participate in the activity of Aksi Bergizi session on visual replicas food shown and matched to nutrional needs?
b2	If yes, did you attend the following activities?
b3	Did you participate in the activity of Aksi Bergizi session on personal hygiene and some examples of action?
b4	If yes, did you attend the following activities?
b5	Did you participate in the activity of Aksi Bergizi session on myths and facts about HIV and became the subject of discussion on HIV?
b6	If yes, did you attend the following activities?
b7	Did you participate in the activity of Aksi Bergizi session on the addictive substance poster functions as a trigger for discussion by presenting a third person as a form of self-projection regarding adolescents who are vulnerable to becoming drug users?
b8	If yes, did you attend the following activities?
b9	Did you participate in the activity of Aksi Bergizi session on NCDs illustrations, and the participants can get to know NCDs more scientifically?
b10	If yes, did you attend the following activities?
b11	Did you participate in the activity of Aksi Bergizi session on various examples of physical activity, and calculate various physical activities that are effective and that participants can easily do on a daily basis?
b12	If yes, did you attend the following activities?
b13	Which of the following would describe that you participated in the activities?
	Section C. Behavioral drivers for dietary and health
c1	I am easily influenced by the first piece of nutritional information I come across when making food choice
c2	To what extent are you influenced by health-related advertisements or endorsements, leading you to make choices that may not align with your best interests?
c3	How often do you seek out information or arguments that confirm your belief that smoking is harmful to your health?
c4	How likely are you to underestimate the health risks of alcohol consumption based on the fact that you know people who drink regularly without apparent negative consequences?
c5	How often do you let social or peer influences sway your decision not to consume substances, such as feeling pressured to use substances in certain social settings?
c6	To what extent do you prioritize immediate comfort or convenience over the potential long-term health benefits associated with physical activity?
c7	How interested are you in learning about the impact of dietary choices on your overall health and well-being?
c8	How excited are you about the potential health benefits and improved quality of life that come with not smoking?
c9	How motivated are you to reduce or eliminate your alcohol consumption for the sake of your health and well-being?
c10	How willing are you to seek support and resources to help you resist the temptation to use drugs?
c11	How curious are you about the benefits and improvements you could experience in your life by being physically active?
c12	How interested are you in learning about methods and practices to protect your reproductive health?
c13	How likely are you to believe that a healthy diet can contribute to overall well-being and prevent diseases?
c14	To what extent do you believe that not smoking is important for your health?
c15	How confident are you in your ability to resist the temptation to consume alcohol?
c16	How enjoyable do you find a drug-free lifestyle compared to consuming drugs?
c17	How important is it for you to incorporate regular physical activity into your daily routine?
c18	How likely are you to seek regular check-ups and screenings to ensure your reproductive health is in good condition?
c19	I am confident that I can maintain a healthy and balanced diet that includes fruits, and vegetables
c20	I am confident that I can limit my consumption of sugary drinks (e.g., soda, energy drinks) to one per week or less
c21	I am confident that I can resist the temptation to engage in unhealthy behaviors (e.g., excessive snacking, skipping exercise)
c22	I am confident that I can do jogging three days or more per week instead of bicycling at regular pace
c23	I am confident that I can do walking five days or more per week instead of sitting or laying down to watch television
c24	I am confident that I can quit smoking (if applicable) and remain smoke-free
c25	I am confident that I can manage my time effectively to prioritize and engage in healthy behaviors regularly
c26	I am confident that I can seek social support and engage in healthy activities with friends or family members
c27	I am confident that I can cope with stress or negative emotions without relying on alcohol and substance use as a coping mechanism
c28	How determined are you to make changes in your dietary and health behaviors?
c29	How likely are you to actively pursue and incorporate healthy dietary and health behaviors into your daily life
c30	How committed are you to making long-term changes in your dietary and health behaviors?
c31	To what extent do you rely on shortcuts or simplified thinking when making decisions about your dietary and health behaviors?
c32	How much do you tend to make decisions about your dietary and health behaviors based on limited information or incomplete understanding?
c33	Do you find it challenging to consider all available options and make fully informed choices regarding your dietary and health behaviors?
	Section D. Dietary habits
	Food Frequency Questionnaire: How often do you eat the following food?
d1	Rice (white rice)
d2	Refined wheat products (white bread, noodles)
d3	Coarse grain (brown rice)
d4	Whole grain wheat products (e.g., brown bread, whole wheat noodles)
d5	Tubers (cassava, taro, white yams, white potato)
d6	Meat (beef, mutton)
d7	Poultry (duck, chicken)
d8a	Fish (raw, grilled, soup, not deep-fried)
d8b	Fresh seafood (e.g., clams, prawns, crabs, octopus)
d9	Eggs
d10	Leafy green vegetables (e.g., Chinese cabbage, long bean, kale, spinach, yu choy, cucumber)
d11	Yellow or orange vegetables (e.g., pumpkin, sweet potatoes, carrots, ripened papaya)
d12	Soybean products (e.g., tofu)
d13	Preserved vegetables (e.g., canned pickled vegetables)
d14	Fresh fruits
d15	Dairy products (fresh milk, powdered milk, boxed milk)
d16	Packaged snacks (e.g., corn puffs, Lay potato chips)
d17	Unpackaged snacks (donuts, french fries, roti, etc.)
d18	Sweetened drinks or condiments (soy milk, soft drinks, coke, coffee or tea with sugar, sweetened condensed milk)
d19	Processed or ultra-processed foods (canned fish, sausages, canned vegetables, frozen food, etc.)
d20	Dessert (e.g., ice cream, cake, candy, cookies, sticky rice with mango, other sweets)
d21	Deep-fried meat or fish (fried, fish, fried chicken, fried beef)
	Section E. Personal Hygiene
e1	During the past 30 days, how often did you wash your hands before eating?
e2	During the past 30 days, how often did you wash your hands after using the toilet or latrine?
e3	During the past 30 days, how often did you use soap when washing your hands?
e4	During the past 30 days, how many times per day did you usually clean or brush your teeth?
e5	During the past 30 days, how often did you u use a toothpaste that contains fluoride when you cleaned or brushed your teeth?
e6	During the past 30 days, how often did you clip your nails?
	Section F. Perception of Non Communicable Diseases (NCDs)
f1	In my opinion, non-communicable diseases involve long-term health conditions
f2	Non-communicable diseases include conditions such as diabetes, heart disease, and cancer
f3	I feel that I can effectively tell parents to do not smoke
f4	I feel that I can remind my family member to maintain suitable bodyweight
f5	I feel that I can remind my family member to do physical activities actively
f6	I feel that I can effectively remind my family member to eat a healthy balanced diet (or) maintain an eating healthy balanced diet to prevent NCDs
f7	I feel that I can effectively remind my family member to take prescribed drugs regularly, if they have either hypertension or hyperlipidemia or diabetes
f8	In your opinion, how can young people help Indonesia fight NCDs?
	Section G. Physical Activity
	G1. Think about all the vigorous activities that you did in the last 7 days. Vigorous physical activities refer to activities that take hard physical effort and make you breathe much harder than normal. Think only about those physical activities that you did for at least 10 minutes at a time?
g1	During the last 7 days, on how many days did you do vigorous physical activities like heavy lifting, digging, aerobics, or fast bicycling?
g1a	Days per week (range 1-7)
g2a	How much time did you usually spend doing vigorous physical activities on one of those days? (In hours per day) (If don't know put "00")
g2b	How much time did you usually spend doing vigorous physical activities on one of those days? (In minutes per day) (If don't know put "00")
	G3. Think about all the moderate activities that you did in the last 7 days. Moderate activities refer to activities that take moderate physical effort and make you breathe somewhat harder than normal. Think only about those physical activities that you did for at least 10 minutes at a time.
g3	During the last 7 days, on how many days did you do moderate physical activities like carrying light loads, bicycling at a regular pace, or doubles tennis? Do not include walking.
g3a	Days per week (range 1-7)
g4a	How much time did you usually spend doing moderate physical activities on one of those days? (If don't know put "00")
g4b	How much time did you usually spend doing moderate physical activities on one of those days? (If don't know put "00")
	G5. Think about the time you spent walking in the last 7 days. This includes at work and at home, walking to travel from place to place, and any other walking that you have done solely for recreation, sport, exercise, or leisure.
g5	During the last 7 days, on how many days did you walk for at least 10 minutes at a time?
g5a	Days per week (range 1-7)
g6a	How much time did you usually spend walking on one of those days? (If don't know put "00")
g6b	How much time did you usually spend walking on one of those days? (If don't know put "00")
	G7. The last question is about the time you spent sitting on weekdays during the last 7 days. Include time spent at work, at home, while doing course work and during leisure time. This may include time spent sitting at a desk, visiting friends, reading, or sitting or lying down to watch television.
g7a	During the last 7 days, how much time did you spend sitting on a week day? (If don't know put "00")
g7b	During the last 7 days, how much time did you spend sitting on a week day? (If don't know put "00")
	Section H. Alcohol, Tobacco, and Substance Use
h1	In your opinion, why do young people use addictive substances? Why do some of those who use addictive substances do so excessively, to the point where there is a substance use disorder?
h2	In your opinion, how can the young generation avoid using addictive substances?
	Alcohol Use
h3	In your lifetime, have you ever drank alcohol (not including sipping or tasting in very small amount)?
h4	When did you start drinking alcohol for the first time? (if Not sure please put "88" or if Refuse to answer please put "99")
h5	When was the most recent occasion that you drank (not including sipping or tasting in very small amount)?
h6	If you wanted to drink alcohol, how long would it take you to buy/find a drink? (If It takes More than 1 day please put "77" or if Not sure please put "88" or if Refuse to answer please put "99")
h7	In the past 30 days, how many times did you drink?
	Tobacco Use
h8	In your lifetime, have you smoked more than 5 packs or 100 sticks of cigarettes?
h9	How old were you when you started smoking entire cigarettes or other tobacco products? (if Not sure please put "88" or if Refuse to answer please put "99")
h10	When was the most recent occasion when you smoked cigarette?
h11	If you wanted to smoke a cigarette, how long would it take you to buy/find one? (If It takes More than 1 day please put "77" or if Not sure please put "88" or if Refuse to answer please put "99")
h12	In the past 12 months, have you ever tried to quit smoking cigarettes?
h13	In the past 12 months, have you ever stopped smoking cigarettes?
h13a	If yes, for how many days
h14	In the past 30 days, how many days did you smoke?
h15	In the past 30 days, on the days that you smoked, how many cigarettes did you use?
h16	In your lifetime, have you ever used an electronic cigarette?
h16a	If yes, how old were you when you first used an electronic cigarette? (if Not sure please put "88" or if Refuse to answer please put "99")
h17	When was the most recent occasion when you used an electronic cigarette?
h18	In the past 12 months, have you ever tried to quit using electronic cigarette?
h19	In the past 12 months, have you ever stopped using electronic cigarette?
h19a	If yes, for how many days
h20	In the past 30 days, how many days did you use electronic cigarette?
h21	In the past 30 days, on the days that you used electronic cigarette, how many times per day did you use electronic cigarette? cigarettes did you use? (one "TIME" consists of around 15 puffs)
	H22. Substance Use
h22	Have you ever used the following drug or substance?
h22a	In your lifetime did you ever use Analgesic (not as medication) (parasetamol)
h22a1	If yes did you ues in the past 12 months
h22a2	If yes did you ues In the past 30 days
h22b	In your lifetime did you ever use Antihistamine (not as medication) (cetirizine)
h22b1	If yes did you ues in the past 12 months
h22b2	If yes did you ues In the past 30 days
h22c	In your lifetime did you ever use Cough syrup (not as medication) (obat batuk)
h22c1	If yes did you ues in the past 12 months
h22c2	If yes did you ues In the past 30 days
h22d	In your lifetime did you ever use Anxiolytics (obat anti depresi)
h22d1	If yes did you ues in the past 12 months
h22d2	If yes did you ues In the past 30 days
h22e	In your lifetime did you ever use Sedatives (obat penenang)
h22e1	If yes did you ues in the past 12 months
h22e2	If yes did you ues In the past 30 days
h22f	In your lifetime did you ever use Energy drinks (extra joss, M-150, kratingdaeng, hemaviton, lainnya)
h22f1	If yes did you ues in the past 12 months
h22f2	If yes did you ues In the past 30 days
h22g	In your lifetime did you ever use PRO [procodyl, promethazine] (obat anti mabok/ antimo)
h22g1	If yes did you ues in the past 12 months
h22g2	If yes did you ues In the past 30 days
h22h	In your lifetime did you ever use LEAN [purple drank] (racikan dari obat demam dengan dosis tinggi yang dicampur dengan minuman soda, es, dan juga permen sebagai penambah rasa)
h22h1	If yes did you ues in the past 12 months
h22h2	If yes did you ues In the past 30 days
h22i	In your lifetime did you ever use Poppers (produk kimia yang mengandung zat Amyl nitrite yang digunakan dengan cara dihirup)
h22i1	If yes did you ues in the past 12 months
h22i2	If yes did you ues In the past 30 days
h22j	In your lifetime did you ever use Kratom leaf (daun kratom, ketum, purik, sepat, kedamba, ithang, kakuan, thom, atau biak)
h22j1	If yes did you ues in the past 12 months
h22j2	If yes did you ues In the past 30 days
h22k	In your lifetime did you ever use Kratom leaf tea mixed with other substance (daun kratom, ketum, purik, sepat, kedamba, ithang, kakuan, thom, atau biak yang dicampur dengan zat lain)
h22k1	If yes did you ues in the past 12 months
h22k2	If yes did you ues In the past 30 days
h22l	In your lifetime did you ever use Cannabis (Ganja)
h22l1	If yes did you ues in the past 12 months
h22l2	If yes did you ues In the past 30 days
h22m	In your lifetime did you ever use Opium (Candu)
h22m1	If yes did you ues in the past 12 months
h22m2	If yes did you ues In the past 30 days
h22n	In your lifetime did you ever use Ecstasy / Love Drug (Inex)
h22n1	If yes did you ues in the past 12 months
h22n2	If yes did you ues In the past 30 days
h22o	In your lifetime did you ever use Ketamine (K khusus)
h22o1	If yes did you ues in the past 12 months
h22o2	If yes did you ues In the past 30 days
h22p	In your lifetime did you ever use Heroin (Putau)
h22p1	If yes did you ues in the past 12 months
h22p2	If yes did you ues In the past 30 days
h22q	In your lifetime did you ever use Inhalants (paint thinner, glue, benzene) (menghirup cairan tiner, lem, dan lainnya)
h22q1	If yes did you ues in the past 12 months
h22q2	If yes did you ues In the past 30 days
h22r	In your lifetime did you ever use Methamphetamine (Sabu)
h22r1	If yes did you ues in the past 12 months
h22r2	If yes did you ues In the past 30 days
h22s	In your lifetime did you ever use Crystal methamphetamine (Narkoba Kristal)
h22s1	If yes did you ues in the past 12 months
h22s2	If yes did you ues In the past 30 days
	Section I. Reproductive Health and Prevention of Sexually Transmitted Diseases (STDs)
i1	I do not want to give salaam when greeting someone who is HIV/AIDS positive
i2	Adolescents who are HIV-positive should be banned from attending schools with HIV-negative students
i3	Adolescents who are HIV-positive should not swim in a pool with HIV-negative students
i4	Adolescents who are HIV-positive should not take part in sports competitions with HIV-negative students
i5	If you have a friend who is HIV positive, you went swimming with them and someone said something against your friend using the pool. What would you do?
i6a	Have you ever had a romantic partner?
i6b	To which gender are you attracted? (multiple answers allowed)
i7	What method of safe sex or prevention from STDs did you know? (More than 1 answer allowed)
i7a	If Other Please Specify
i8	Have you ever been taught about AIDS or HIV at school?
i9	Have you ever been taught about birth control at school?

## Sheet: choices
Variable	Value	Label (meaning)
intervention	0	Student at a non-target school
intervention	1	Student at a target school
a2	1	Male
a2	2	Female
a2	99	Refuse to answer
a4	1	Minangnese
a4	2	Javanese
a4	3	Bataknese
a4	4	Sundanese
a4	5	Others
a4	88	Don’t know
a4	99	Refuse to answer
a5	1	Civil servant / state enterprise
a5	2	Private sector employee
a5	3	Small-scale vendors / service providers
a5	4	Business owner / entrepreneur
a5	5	Laborer / manual workers
a5	6	Retired / homemaker
a5	7	Agriculture / Fishery
a5	8	Independent professions (e.g., lawyers, architects)
a5	9	Unemployed
a5	99	Refuse to answer
a5	0	Deceased
a6	1	Never went to school
a6	2	Primary school
a6	3	Junior high school
a6	4	High school
a6	5	Vocational certificate
a6	6	Associate's degree
a6	7	Vocational diploma
a6	8	Bachelor's degree
a6	9	Higher than bachelor's degree
a6	88	Not sure
a6	99	Refuse to answer
a7	1	Housewife/ retired/ homemaker
a7	2	Civil servant / state enterprise
a7	3	Private sector employee
a7	4	Small-scale vendors / service providers
a7	5	Business owner / entrepreneur
a7	6	Laborer / manual workers
a7	7	Agriculture / Fishery
a7	8	Independent professions (e.g., lawyers, architects)
a7	9	Unemployed
a7	99	Refuse to answer
a7	0	Deceased
a9	1	No more than 1,000,000 IDR
a9	2	1,000,000 to 2,000,000 IDR
a9	3	2,000,001 to 3,000,000 IDR
a9	4	3,000,001 to 4,000,000 IDR
a9	5	4,000,001 to 5,000,000 IDR
a9	6	5,000,001 to 6,000,000 IDR
a9	7	More than 6,000,000 IDR
a9	88	Not sure / Uncertain / Don't know
a9	99	Refuse to answer
a10	1	Islam
a10	2	Buddhism
a10	3	Christianity
a10	77	Others
a10	99	Refuse to answer
a13	1	Television advertisements
a13	2	Community events
a13	3	Informational brochures
a13	4	Family and/or friends
a13	5	Social media platforms (e.g., Facebook, Twitter, Instagram, etc)
a14	1	Very accurate
a14	2	Somewhat accurate
a14	3	Very inaccurate
a15	1	Strongly agrre
a15	2	Agree
a15	3	Disagree
a15	4	Strongly disagree
b1	0	No
b1	1	Yes
b2	1	Briefing
b2	2	Activity
b2	3	Discussion
b13	1	Full (paying close attention, looking, and listening everything)
b13	2	Relatively high (talked to friends occasionally, but looking, and listening everything)
c1	1	Strongly disagree
c1	2	Disagree
c1	3	Agree
c1	4	Strongly agree
c3	1	Never
c3	2	Rarely
c3	3	Sometimes
c3	4	Most of the time
c3	5	Always
c4	1	Very unlikely
c4	2	Unlikely
c4	3	Likely
c4	4	Very likely
c5	1	Never
c5	2	Rarely
c5	3	Sometimes
c5	4	Most of the time
c5	5	Always
c6	1	Not at all
c6	2	Slightly
c6	3	Moderate
c6	4	Completely
c7	1	Not at all interested
c7	2	Not very interested
c7	3	Somewhat interested
c7	4	Very interested
c8	1	Not at all excited
c8	2	Not very excited
c8	3	Somewhat excited
c8	4	Very excited
c9	1	Not at all motivated
c9	2	Not very motivated
c9	3	Somewhat motivated
c9	4	Very motivated
c10	1	Not willing at all
c10	2	Not very willing
c10	3	Somewhat willing
c10	4	Very willing
c11	1	Not curious at all
c11	2	Not very curious
c11	3	Somewhat curious
c11	4	Very curious
c12	1	Not at all interested
c12	2	Not very interested
c12	3	Somewhat interested
c12	4	Very interested
c13	1	Very unlikely
c13	2	Unlikely
c13	3	Likely
c13	4	Very likely
c14	1	Not important
c14	2	Slightly important
c14	3	Quite important
c14	4	Very important
c15	1	Not committed
c15	2	Slightly committed
c15	3	Quite committed
c15	4	Very committed
c16	1	Not enjoyable
c16	2	Slightly enjoyable
c16	3	Quite enjoyable
c16	4	Very enjoyable
c17	1	Not important
c17	2	Slightly important
c17	3	Quite important
c17	4	Very important
c18	1	Very unlikely
c18	2	Unlikely
c18	3	Likely
c18	4	Very likely
c19	1	Strongly disagree
c19	2	Disagree
c19	3	Agree
c19	4	Strongly agree
c28	1	Not determined at all
c28	2	Slightly determined
c28	3	Moderately determined
c28	4	Very determined
c29	1	Very unlikely
c29	2	Unlikely
c29	3	Likely
c29	4	Very likely
c30	1	Not committed
c30	2	Slightly committed
c30	3	Quite committed
c30	4	Very committed
c31	1	Never
c31	2	Rarely
c31	3	Sometimes
c31	4	Most of the time
c31	5	Always
c32	1	Not at all
c32	2	Very little
c32	3	Moderately
c32	4	Quit a bit
c32	5	A lot
c33	1	Not at all
c33	2	Very little
c33	3	Moderately
c33	4	Quit a bit
c33	5	A lot
d1	1	Never or less than once per month
d1	2	1-3 times per month
d1	3	Once a week
d1	4	2-4 times per week
d1	5	5-6 times per week
d1	6	Once a day
d1	7	More than once a day
d1	99	Refuse to answer
e1	1	Never
e1	2	Rarely
e1	3	Sometimes
e1	4	Most of the time
e1	5	Always
e2	1	Never
e2	2	Rarely
e2	3	Sometimes
e2	4	Most of the time
e2	5	Always
e3	1	Never
e3	2	Rarely
e3	3	Sometimes
e3	4	Most of the time
e3	5	Always
e4	1	Never
e4	2	Not every day
e4	3	Every day, once per day
e4	4	Every day, twice per day
e4	5	Every day, more than twice per day
e5	1	Never
e5	2	Not every day
e5	3	Every day, once per day
e5	4	Every day, twice per day
e5	5	Every day, more than twice per day
e6	1	Never
e6	2	One time per week
e6	3	One time per two weeks
e6	4	One time per three weeks
e6	5	One time per four weeks or did not clip
f1	1	Strongly agree
f1	2	Agree
f1	3	Disagree
f1	4	Strongly Disagree
g1	1	Yes
g1	2	No vigorous physical activities
g3	1	Yes
g3	2	No moderate physical activities
g5	1	Yes
g5	2	No walking
h3	0	Never drank
h3	1	Yes
h3	88	Not sure
h3	99	Refuse to answer
h5	1	More than 12 months ago
h5	2	More than 30 days ago but within past 12 months
h5	3	More than 1 week ago but within past 30 days
h5	4	Within the past 1 week
h7	0	None
h7	1	1-2 times
h7	2	3-5 times
h7	3	6-9 times
h7	4	10-19 times
h7	5	20 times or more
h7	88	Not sure
h7	99	Refuse to answer
h8	0	Never smoked
h8	1	Yes, but not more than 5 packs or 100 sticks
h8	2	Yes
h8	88	Not sure
h8	99	Refuse to answer
h10	1	More than 12 months ago
h10	2	More than 30 days ago but within past 12 months
h10	3	More than 1 week ago but within past 30 days
h10	4	Within the past 1 week
h10	88	Not sure
h10	99	Refuse to answer
h12	0	No
h12	1	Yes
h12	99	Refuse to answer
h14	0	None (Skip to Question H16)
h14	1	1-2 days
h14	2	3-5 days
h14	3	6-9 days
h14	4	10-19 days
h14	5	20 days or more
h14	88	Not sure
h14	99	Refuse to answer
h15	1	Less than 1 per day
h15	2	1 per day
h15	3	2-5 per day
h15	4	6-10 per day
h15	5	11-20 per day
h15	6	More than 20 per day
h15	88	Not sure
h15	99	Refuse to answer
h16	0	Never smoked
h16	1	Yes
h16	99	Refuse to answer
h22	1	Yes
h22	2	No
i1	1	Strongly agree
i1	2	Agree
i1	3	Disagree
i1	4	Strongly Disagree
i6a	0	No
i6a	1	Yes
i6a	99	Refuse to answer
i6b	1	Male (cisgender)
i6b	2	Female (cisgender)
i6b	3	Transgender female
i6b	4	Transgender male
i6b	5	Neither male nor female
i6b	6	I'm not sure to whom I am attracted
i6b	7	I'm not attracted to any gender
i6b	99	Refuse to answer
i7	0	None
i7	1	Absitinence
i7	2	Avoiding activities high risk with mucosal tear
i7	3	Wore condom
i7	4	Suppository
i7	5	Taking Pre-exposure prophylaxis (PreP)
i7	6	Taking Post-exposure prophylaxis (PEP)
i7	77	Other methods
i7	88	Don't know / Not sure
i7	99	Refuse to answer
i8	0	Never
i8	1	Yes
i8	88	Don't know / Not sure
i8	99	Refuse to answer
i9	0	Never
i9	1	Yes
i9	88	Don't know / Not sure
i9	99	Refuse to answer
